# Supplementary material for: Two-Step Activation Mechanism of the ClpB Disaggregase for Sequential Substrate Threading by the Main ATPase Motor
Source: PubMed Central journal article supplement (PMC6593972; doi:10.1016/j.celrep.2019.05.075), 2019-06-18
Supplement: mmc1.pdf [file mmc1.pdf]

**Cell Reports, Volume 27**

**Supplemental Information**

**Two-Step Activation Mechanism of the ClpB**

**Disaggregase for Sequential Substrate**

**Threading by the Main ATPase Motor**

**Célia Deville, Kamila Franke, Axel Mogk, Bernd Bukau, and Helen R. Saibil**

# **Two-step activation mechanism of the ClpB disaggregase for sequential substrate threading by the main ATPase motor**

Célia Deville<sup>1,2,\*</sup>, Kamila Franke<sup>3,\*</sup>, Axel Mogk<sup>3,4</sup>, Bernd Bukau<sup>3,4</sup>, Helen R. Saibil<sup>1,4</sup>

<sup>1</sup> Department of Crystallography, Institute of Structural and Molecular Biology, Birkbeck, University of London, Malet Street, London WC1E 7HX, United Kingdom.

<sup>2</sup> present address: Department of Integrative Structural Biology, Institut de Génétique et de Biologie Moléculaire et Cellulaire, INSERM, U964, CNRS, UMR-7104, Université de Strasbourg, Illkirch–Graffenstaden, France.

<sup>3</sup> Center for Molecular Biology of University of Heidelberg (ZMBH) and German Cancer Research Center (DKFZ), DKFZ-ZMBH Alliance, Im Neuenheimer Feld 282, D-69120 Heidelberg, Germany.

<sup>4</sup> corresponding authors

Email:

[h.saibil@mail.cryst.bbk.ac.uk](mailto:h.saibil@mail.cryst.bbk.ac.uk) (H. R. S.)

[bukau@zmbh.uni-heidelberg.de](mailto:bukau@zmbh.uni-heidelberg.de) (B.B)

[a.mogk@zmbh.uni-heidelberg.de](mailto:a.mogk@zmbh.uni-heidelberg.de) (A. M.)

\* these authors equally contributed to this work

## **List of supplementary information**

Supplementary figures 1 to 7

Supplementary tables 1 to 3

Supplementary movies 1 to 2

**Figure S1**

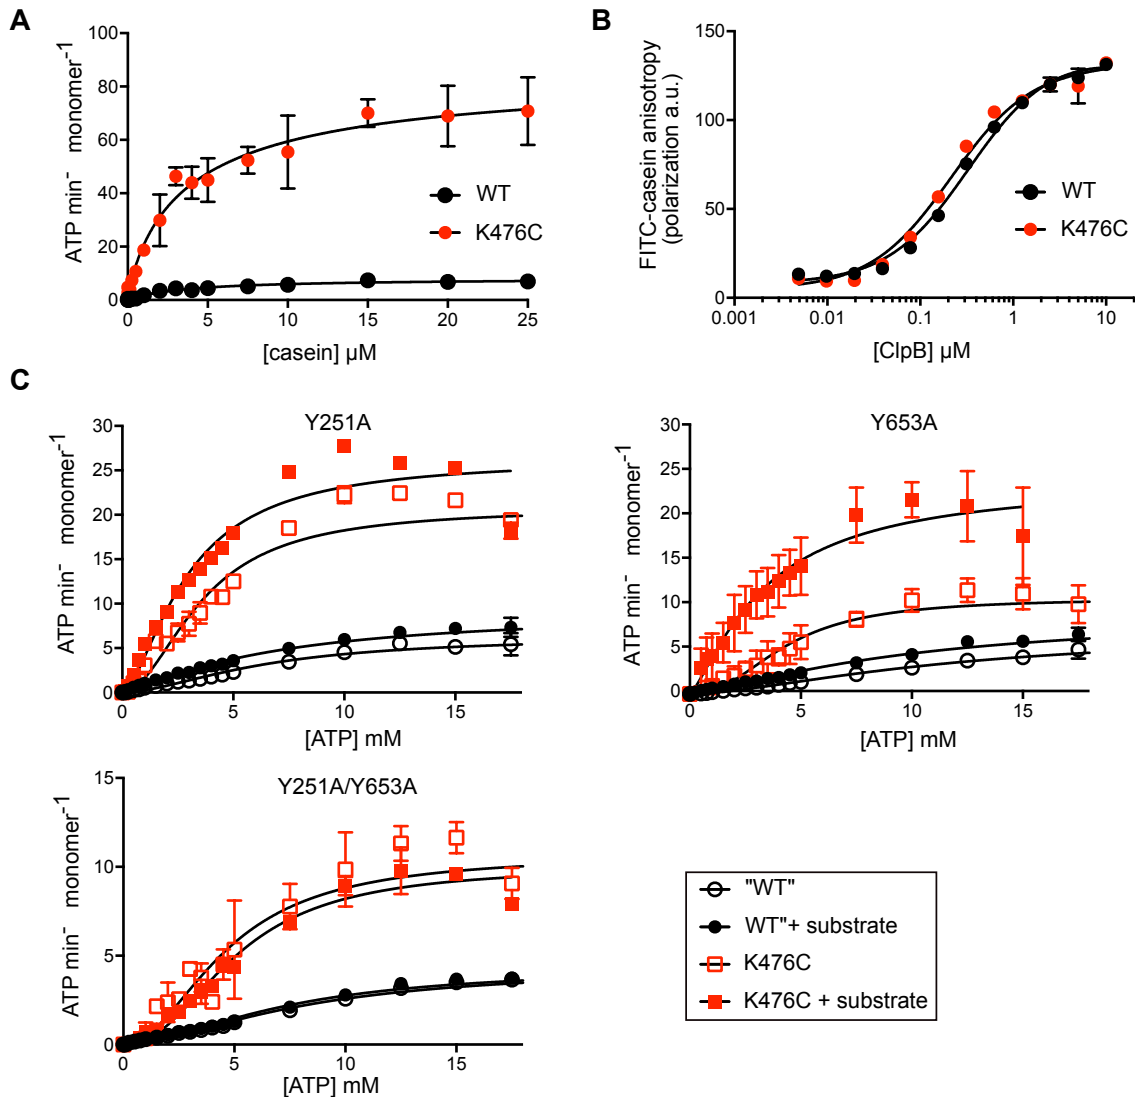

**Figure S1. ATPase activities and substrate binding of ClpB-WT and mutants. Related to Figure 1.** (A) ATPase activities of ClpB-WT and ClpB-K476C were determined in presence of increasing casein concentrations. (B) Binding of ATPase-deficient ClpB-E279A/E678A or ClpB-K476C/E279A/E678A to fluorescein-labeled FITC-casein was determined in presence of 2 mM ATP by anisotropy measurements. (C) ATPase activities of pore 1 and pore 2 mutants of ClpB-WT or ClpB-K476C were determined at the indicated ATP concentrations in absence and presence of substrate casein. Standard deviations are indicated; for some points error bars are shorter than the height of the symbol and are not depicted.

**Figure S2**

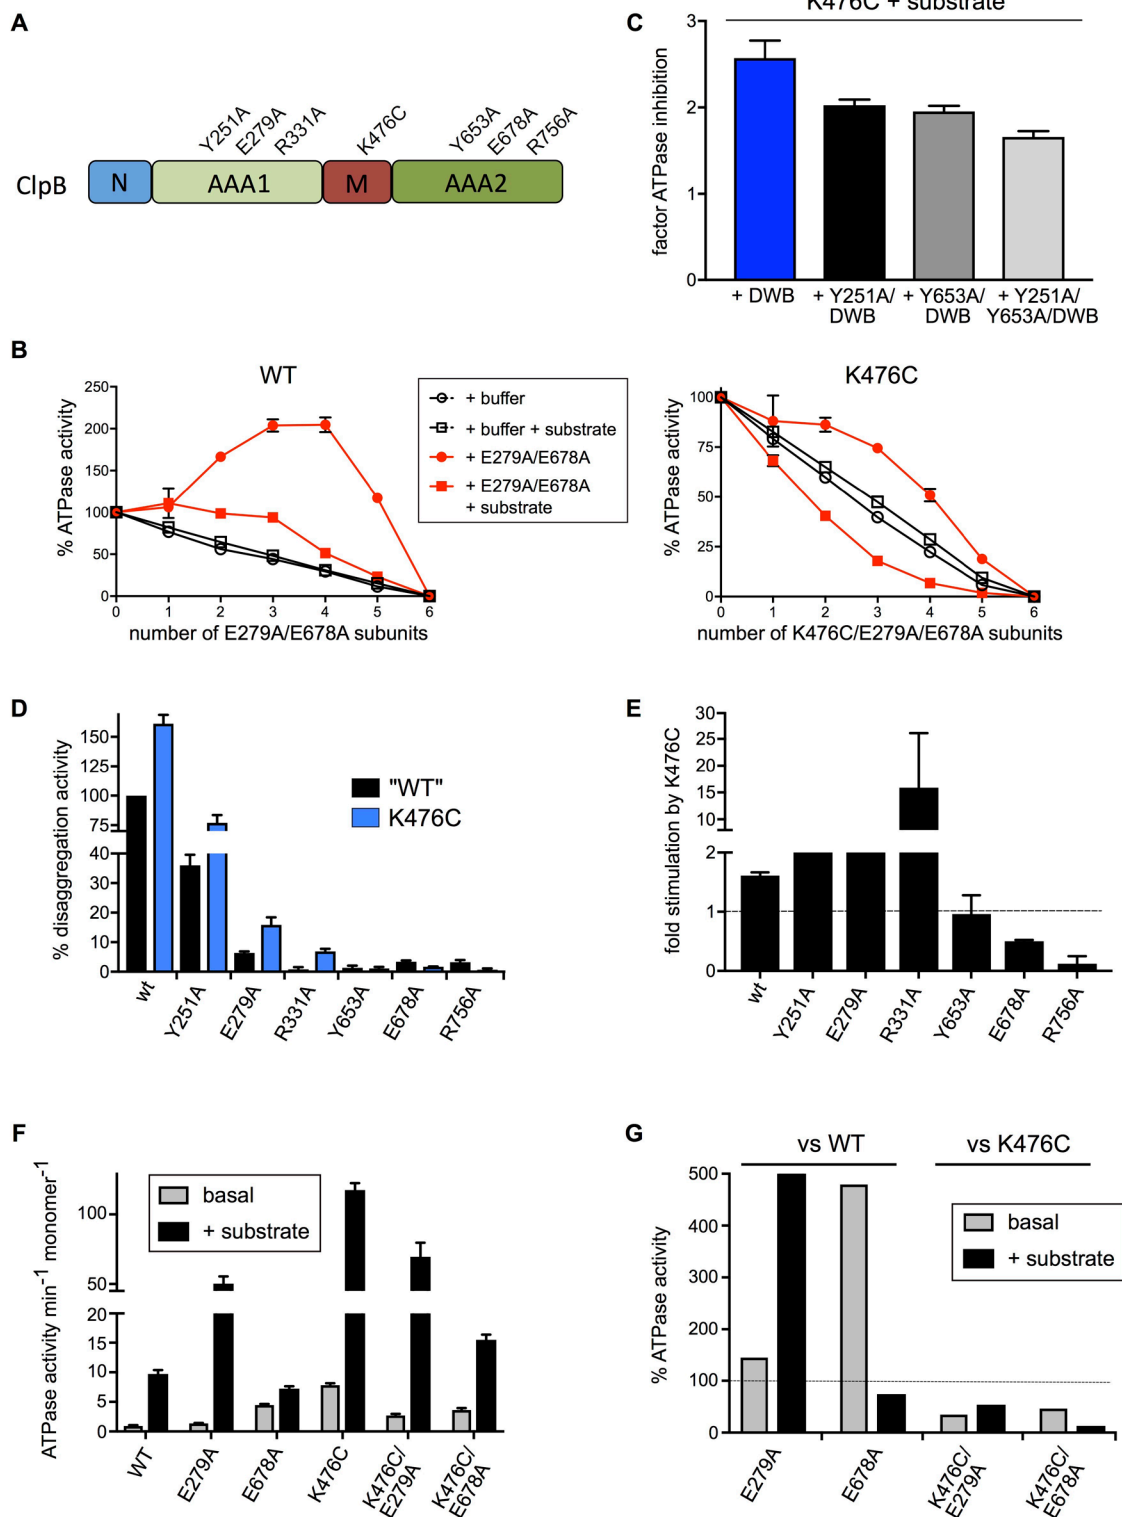

**Figure S2. ATPase and disaggregation activities of ClpB WT and mutants. Related to Figure**

**1.** (A) ClpB domain organization and diverse mutants affecting substrate binding and threading (Y251A, Y653A) or ATP hydrolysis (E279A, R331A, E678A, R756A). (B) ATPase activities of mixtures of ClpB-WT or ClpB-K476C and corresponding E279A/E678A mutant subunits that bind but cannot hydrolyze ATP were determined in the absence and presence of substrate. The ATPase activities of ClpB-WT or ClpB-K476C dilutions corresponding to their concentrations in the mixes were determined as reference. The ATPase activities of non-diluted ClpB-WT or ClpB-K476C were set to 100%. Mixing ratios are indicated as number of E279A/E678A mutant subunits. (C) ATPase activities of 1:1 mixtures of ClpB-K476C and its ATPase deficient E279A/E678A (DWB) or pore mutant derivatives were determined in presence of substrate and compared to non-mixed ClpB-K476C. The factor of ATPase inhibition by mutant subunit incorporation was determined (factor 1: no change). (D) MDH disaggregation activities of ClpB wild type (WT) and ClpB-K476C and Walker B (E279A, E678A), Arginine finger (R331A, R756A) and pore loop (Y251A, Y653A) mutant derivatives of AAA-1 or AAA-2 domains were determined. The activity of ClpB-WT was set to 100%. (E) The relative increase in MDH disaggregation activities for the indicated mutant protein upon relief of M-domain repression (K476C) was determined. (F) ATPase activities of ClpB wild type (WT) and ClpB-K476C derivatives that can only hydrolyse ATP at AAA-2 (E279A) or AAA-1 (E678A) were determined in absence (basal) and presence of casein (+ substrate). Standard deviations are indicated; for some points error bars are shorter than the height of the symbol and are not depicted. (G) Changes in ATPase activities in ClpB mutants that can hydrolyse ATP only at either AAA-2 (E279A) or AAA-1 (E678A). Basal and substrate-stimulated ATPase activities of ClpB WT or ClpB-K476C were set to 100%.

Figure S3

ClpB-K476C

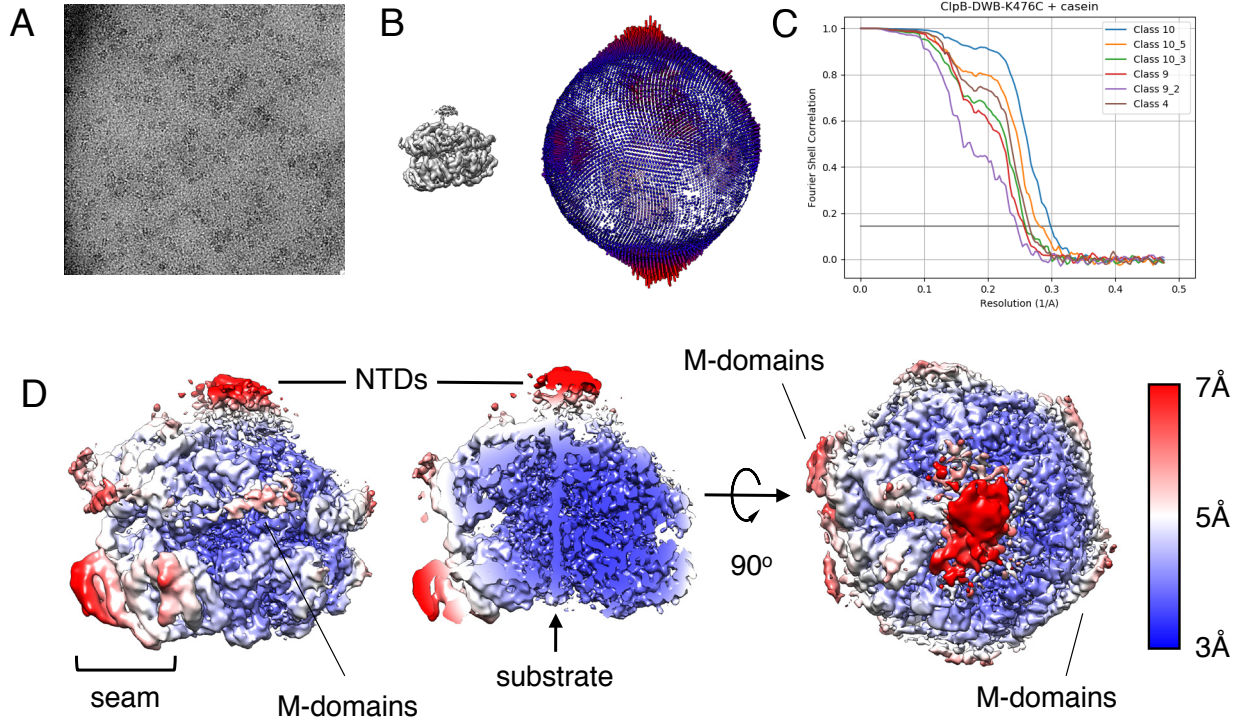

ClpB wt

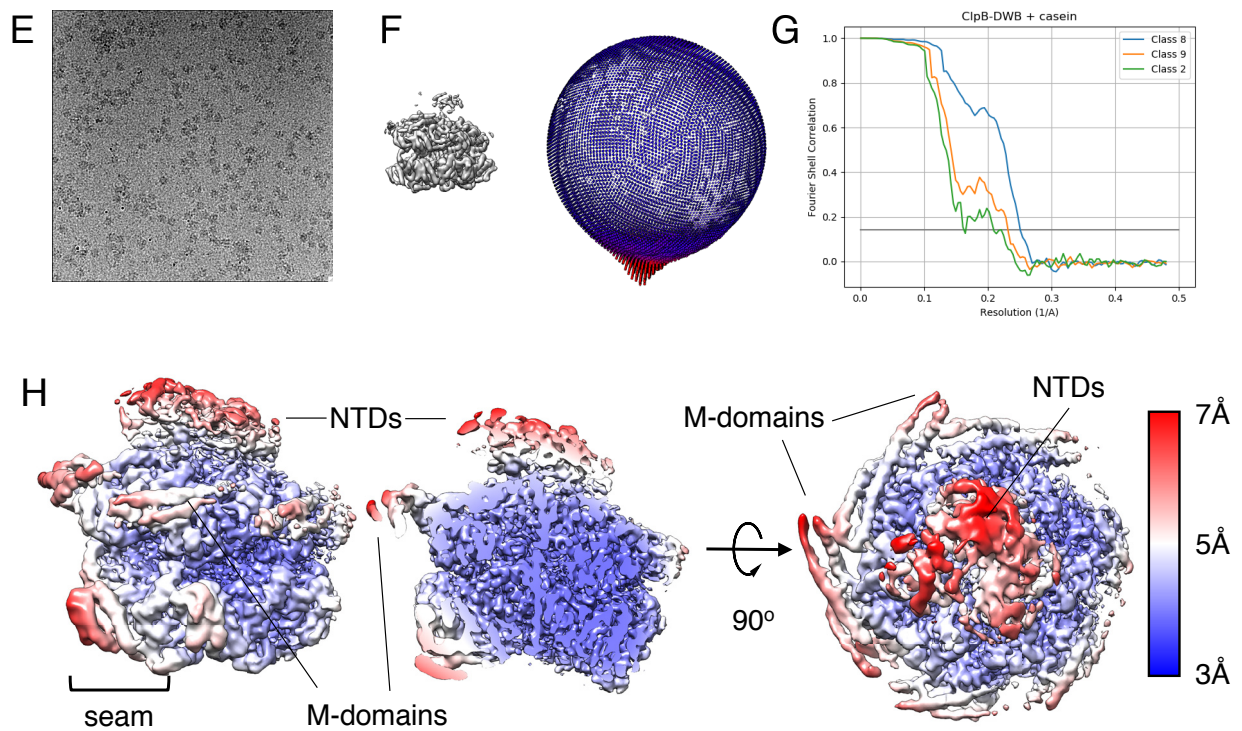

**Figure S3. Analysis of substrate-bound ClpB-DWB-K476C and ClpB-DWB cryo-EM data.**

**Related to STAR methods.** (A) Representative micrograph of the ClpB-DWB-K476C:casein complex in the presence of ATP $\gamma$ S, on graphene oxide support. (B) Angular distribution of the particles in the final reconstruction for 10\_5. There are preferential orientations for top views as well as some side views. Other states display similar angular distributions. (C) Gold standard Fourier shell correlation (FSC) curves for different ClpB-DWB-K476C:casein reconstructions. (D) Plot of the local resolution on the surface of the class 10\_5 density map from a side view (left), cut view (middle) and top view (right). The resolution is lower for N-terminal domains (NTDs), the partly visible M-domains and the AAA domains of the A and F seam protomers. (E) Representative micrograph of the ClpB-DWB:casein complex in the presence of ATP $\gamma$ S. (F) Angular distribution of the particles in the final reconstruction for class 8. There are preferential orientations for top views as well as some side views. Other states display similar angular distributions. (G) Gold standard Fourier shell correlation (FSC) curves for different ClpB-DWB:casein reconstructions. (H) Plot of the local resolution on the surface of the class 8 density map from a side view (left), cut view (middle) and top view (right). The resolution is lower for the N-terminal domains (NTDs), M-domains and the AAA domains of A and F seam protomers.

Figure S4

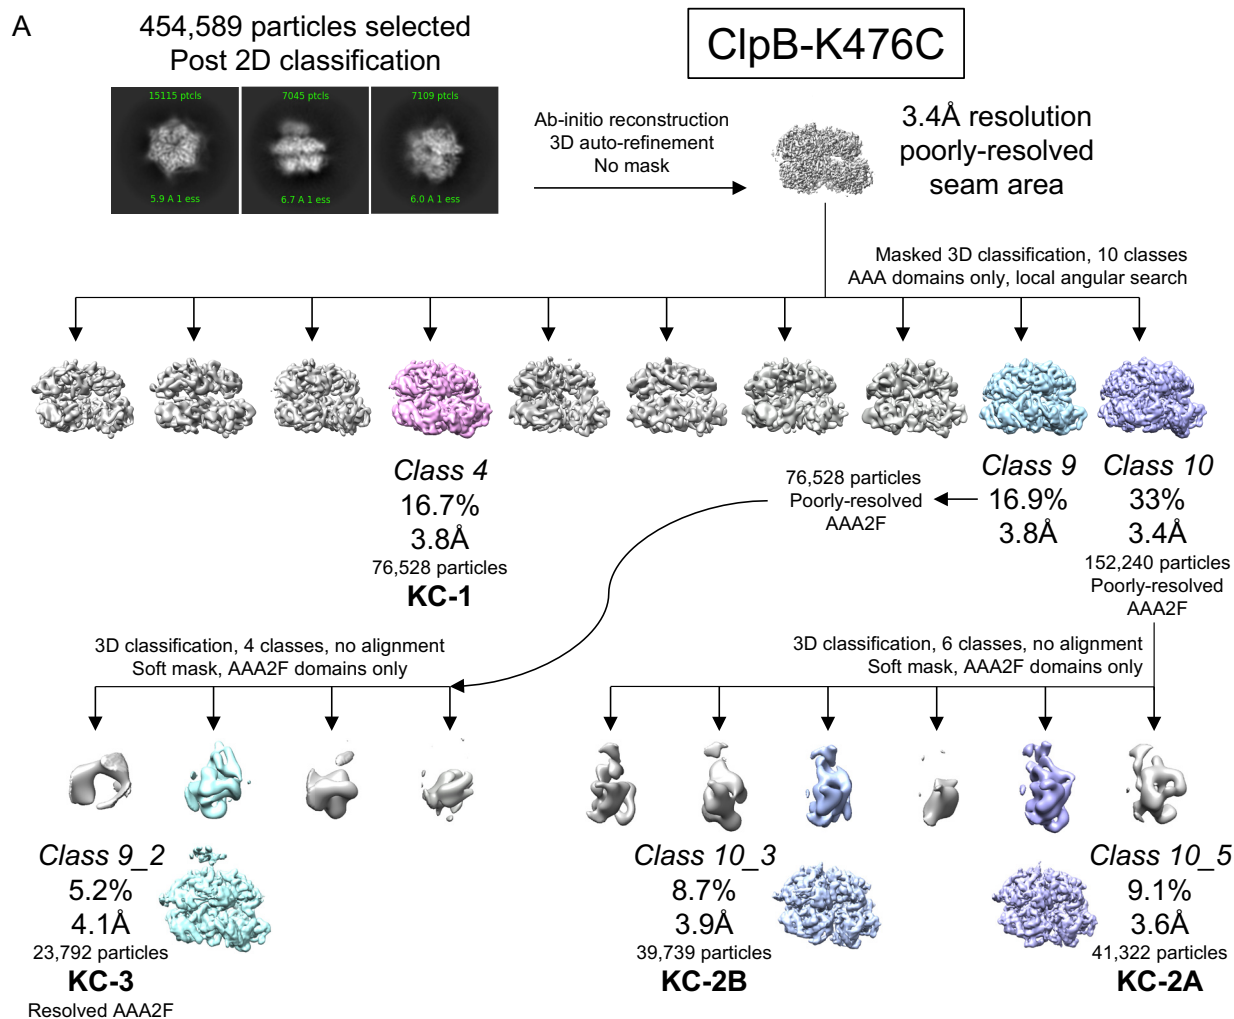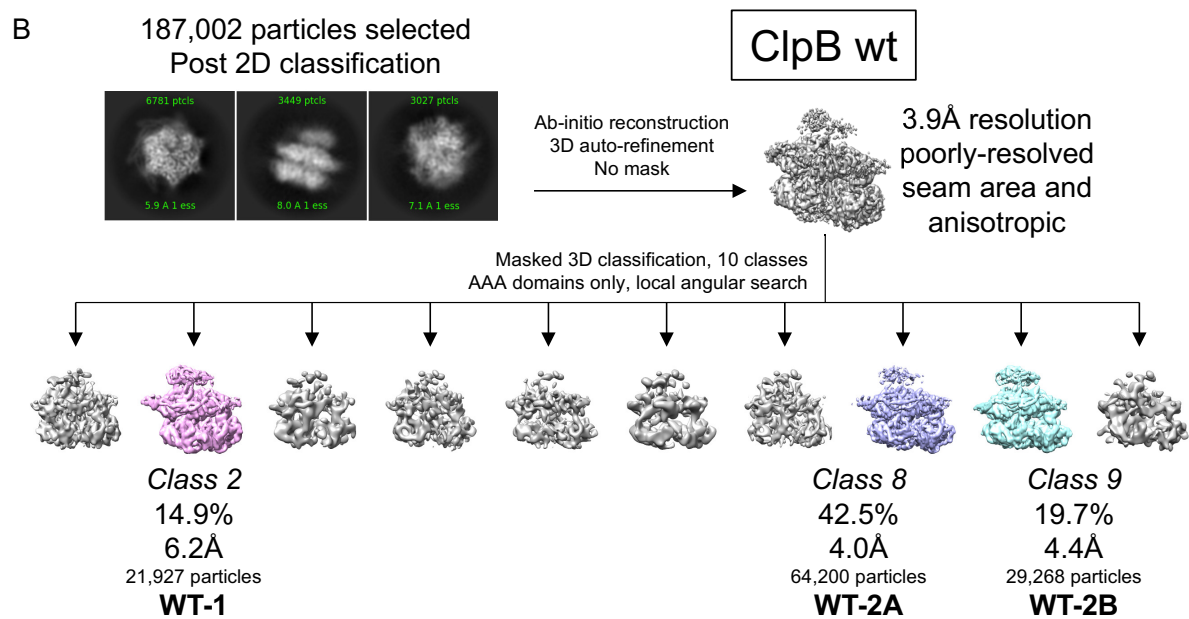



**Figure S4. Classification workflow used for data processing of the ClpB-DWB-K476C:casein (A) and ClpB-DWB:casein (B) complex structures. Related to STAR methods.**

The classes selected for further refinement are shown in color. (A): pink for class 4 yielding state KC-1, purple for classes 10, 10\_3 and 10\_5 yielding states KC-2A and KC-2B and blue for class 9 and 9\_2 yielding state KC-3. (B): pink for class 2 yielding state WT-1, purple for class 8 yielding state WT-2A and blue for class 9 yielding state WT-2B.

Figure S5

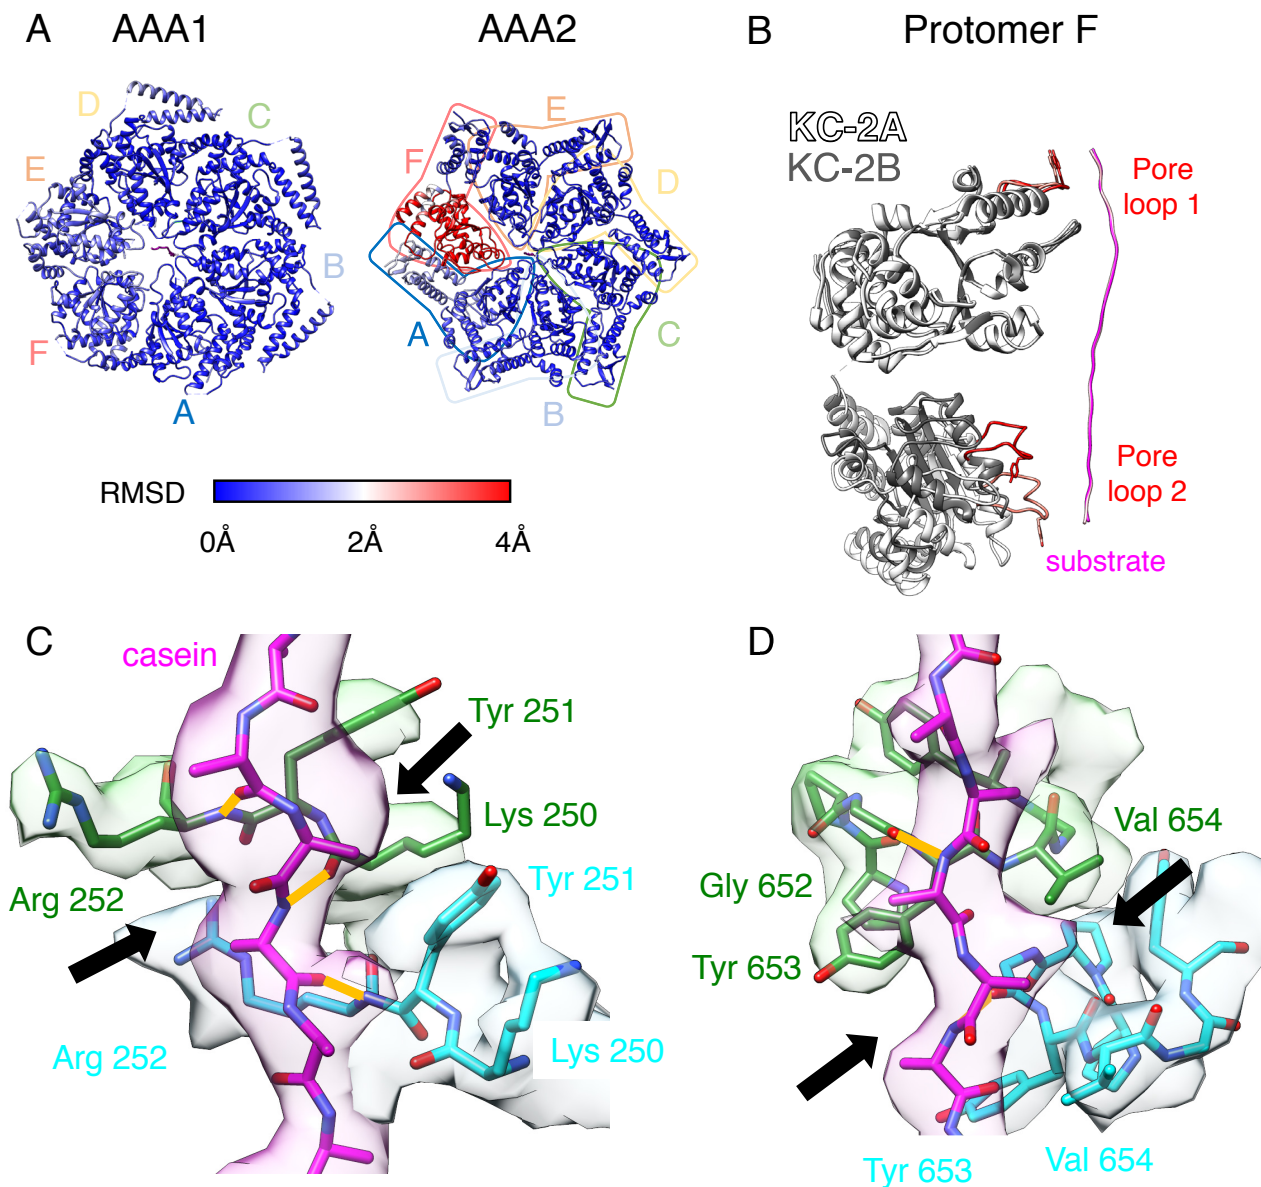

**Figure S5. Comparison of states KC-2A and KC-2B and details of ClpB-K476C pore loop - substrate interactions. Related to Figures 2 and 3.** (A) RMSD between the KC-2A and KC-2B states is displayed on the KC-2A atomic model. Transitions from identical to different conformations are colored from blue to red. (B) Superimposed atomic models of protomer F and substrate casein of KC-2A (white) and KC-2B (grey). The pore loops are shown in orange (KC-2A) and red (KC-2B). (C,D) Overall organisation of ClpB-K476C pore loops bound to the substrate modelled as a poly-alanine chain (shown for KC-2A). The pore loops including

conserved tyrosine residues form a spiral track of interactions and bind to the extended substrate in steps of two residues. Close-up of the ClpB-K476C:casein interactions in AAA1 (C) and AAA2 (D), shown for protomers B and C. The backbones of Lys250 and Arg252 in AAA1 and of Gly652 in AAA2 form hydrogen bonds with the backbone of the substrate. Pockets that accommodate the substrate side chains are shown with black arrows. They are formed by tyrosine side chains, pointing up in AAA1 and down in AAA2, on the one hand and by stacked Arg252 in AAA1 and stacked Val654 in AAA2 on the other hand.

Figure S6

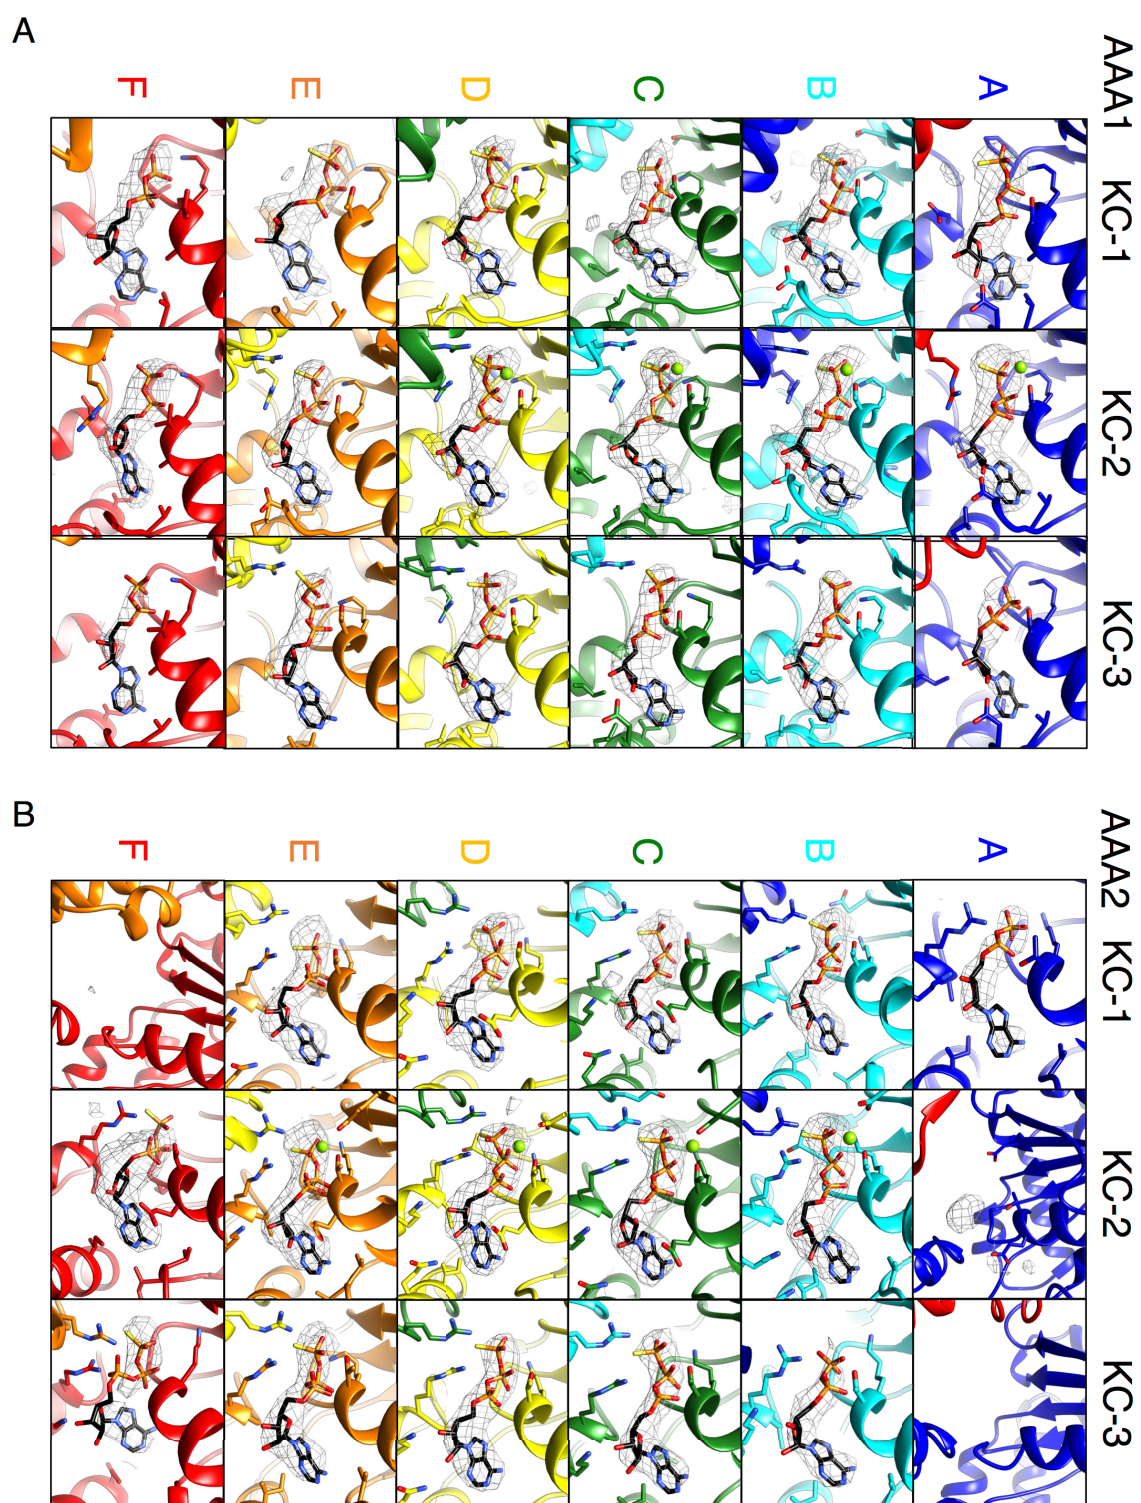

**Figure S6. Nucleotide densities. Related to figure 3.** (A) AAA1 domains and (B) AAA2 domains, for KC-1, KC-2 and KC-3 states. Densities are shown at the same threshold for each state.

**Figure S7**

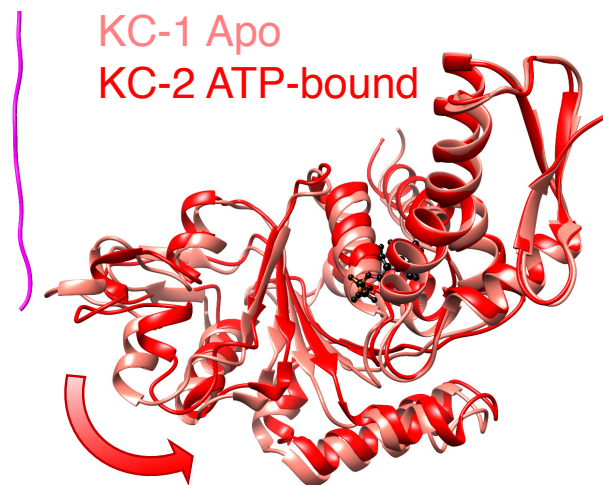

**Figure S7. Dissociation of AAA2F upon conversion from KC-1 to KC-2. Related to Figure 4.** Apo AAA2F is bound to the substrate in KC-1 (in salmon color). Binding of ATP induces closing of the hinge between the small and large domains of AAA2F, thus triggering detachment of AAA2F from the substrate in KC-2 (in red).

**Table S1: Steady state ATPase activities of ClpB wild type (WT) and mutants in the absence and presence of substrate (+ casein). Related to Figure 1.**

| ClpB variant               | $v_{\max}$ ( $\text{min}^{-1}$ ) | $K_{0.5}$ (mM)  | $n_{\text{Hill}}$ |
|----------------------------|----------------------------------|-----------------|-------------------|
| WT                         | $8.8 \pm 0.5$                    | $8.7 \pm 0.5$   | $2.5 \pm 0.2$     |
| WT+ casein                 | $25.9 \pm 1.2$                   | $4.3 \pm 0.3$   | $1.5 \pm 0.1$     |
| Y251A                      | $5.53 \pm 0.4$                   | $5.29 \pm 0.23$ | $2.12 \pm 0.18$   |
| Y251A + casein             | $7.33 \pm 0.5$                   | $4.51 \pm 0.2$  | $1.69 \pm 0.21$   |
| Y653A                      | $5.01 \pm 0.4$                   | $7.52 \pm 0.27$ | $2.18 \pm 0.14$   |
| Y653A + casein             | $6.72 \pm 0.5$                   | $6.2 \pm 0.3$   | $1.85 \pm 0.15$   |
| Y251A/Y653A                | $3.65 \pm 0.3$                   | $6.27 \pm 0.27$ | $2.14 \pm 0.17$   |
| Y251A/Y653A + casein       | $3.74 \pm 0.3$                   | $5.92 \pm 0.25$ | $2.26 \pm 0.29$   |
| K476C                      | $37.0 \pm 1.3$                   | $5.1 \pm 0.2$   | $1.9 \pm 0.1$     |
| K476C +casein              | $130.2 \pm 6.0$                  | $1.4 \pm 0.1$   | $1.3 \pm 0.1$     |
| K476C/Y251A                | $22.43 \pm 1.1$                  | $3.93 \pm 0.21$ | $1.91 \pm 0.2$    |
| K476C/Y251A + casein       | $27.78 \pm 1.2$                  | $3.14 \pm 0.14$ | $1.62 \pm 0.13$   |
| K476C/Y653A                | $11.68 \pm 1.7$                  | $4.68 \pm 0.19$ | $2.16 \pm 0.19$   |
| K476C/Y653A + casein       | $21.85 \pm 1.9$                  | $2.86 \pm 0.16$ | $1.57 \pm 0.16$   |
| K476C/Y251A/Y653A          | $11.64 \pm 0.7$                  | $5.04 \pm 0.34$ | $2.09 \pm 0.29$   |
| K476C/Y251A/Y653A + casein | $9.78 \pm 0.6$                   | $4.89 \pm 0.17$ | $2.47 \pm 0.21$   |

**Table S2: Details of cryo-electron microscopy image acquisition. Related to STAR Methods.**

| Complex                                   | ClpB-DWB-K476C<br>+ casein + ATP $\gamma$ S | ClpB-DWB + casein<br>+ATP $\gamma$ S |
|-------------------------------------------|---------------------------------------------|--------------------------------------|
| Microscope                                | Titan Krios                                 |                                      |
| Voltage                                   | 300kV                                       |                                      |
| Camera                                    | K2 summit (Gatan)                           |                                      |
| Pixel size (Å)                            | 1.05                                        | 1.04                                 |
| Total dose<br>(electrons/Å <sup>2</sup> ) | 50                                          | 50                                   |
| Number of frames                          | 50                                          | 42                                   |
| Defocus range                             | -1.5 to -3.5 $\mu$ m                        | -1.5 to -3.5 $\mu$ m                 |
| Number of movies                          | 6060                                        | 1687                                 |
| Nb of particles picked                    | 875,861                                     | 290,830                              |
| Nb of particles refined                   | 454,589                                     | 187,002                              |
| Grid type                                 | AuFoil 1.2/1.3, 300<br>mesh, GO coated      | AuFoil 1.2/1.3, 300<br>mesh          |

**Table S3: Details of cryo-EM density maps. Related to STAR Methods**

| State                        | Class | 0.143 FSC cutoff | Number of particles | EMDB code | PDB code |
|------------------------------|-------|------------------|---------------------|-----------|----------|
| <b>ClpB-DWB-K476C:casein</b> |       |                  |                     |           |          |
| KC-1                         | 4     | 3.78 Å           | 76,528              | 4624      | 6QS6     |
| KC-2                         | 10    | 3.36 Å           | 152,240             | 4625      |          |
| KC-2A                        | 10_5  | 3.60 Å           | 41,322              | 4626      | 6QS7     |
| KC-2B                        | 10_3  | 3.89 Å           | 39,739              | 4627      | 6QS8     |
|                              | 9     | 3.93 Å           | 76,528              |           |          |
| KC-3                         | 9_2   | 4.09 Å           | 23,792              | 4621      | 6QS4     |
| MD-1                         |       | 3.68 Å           | 224,759             | 4622      |          |
| MD-2                         |       | 3.53 Å           | 165,200             | 4623      |          |
| <b>ClpB-DWB:casein</b>       |       |                  |                     |           |          |
| WT-1                         | 2     | 6.21 Å           | 21,927              | 4940      | 6RN2     |
| WT-2A                        | 8     | 4.04 Å           | 64,200              | 4941      | 6RN3     |
| WT-2B                        | 9     | 4.38 Å           | 29,268              | 4942      | 6RN4     |



**Movie S1.** Movie1wholePDB.mov

**Movie S2.** Movie2WTvsKC.mov
